# Supplementary material for: Analysis of Investment Returns as Markov Chain Random Walk
Source: Hindawi journal article supplement (doi:10.1155/2024/3966566), 2024-02-21
Supplement: f1 [file 3966566.f1.docx]

| Observation Date | CANADA | INDIA | Mexico | South Africa | Switzerland |
| --- | --- | --- | --- | --- | --- |
| 1976-01-01 | 0.050723 | 0.037663 | 0.090972 | 0.021979 | 0.033637 |
| 1976-02-01 | 0.062307 | 0.037259 | 0.04256 | -0.01093 | -0.03088 |
| 1976-03-01 | -0.00423 | -0.00967 | 0.154151 | -0.01105 | 0.020802 |
| 1976-04-01 | -0.00345 | -0.03662 | 0 | -0.0339 | -0.01839 |
| 1976-05-01 | 0.014037 | 0.004024 | -0.03637 | 0.06669 | -0.01769 |
| 1976-06-01 | -0.02101 | -0.00806 | 0 | -0.02174 | 0.031344 |
| 1976-07-01 | -0.01095 | 0.029912 | 0 | -0.05651 | 0.006422 |
| 1976-08-01 | 0.001443 | 0.047011 | 0 | -0.11054 | -0.00034 |
| 1976-09-01 | -0.00129 | 0.031368 | 0.071459 | 0.012905 | -0.01665 |
| 1976-10-01 | -0.04824 | -0.01096 | -0.1092 | -0.02598 | -0.03736 |
| 1976-11-01 | -0.04357 | -0.01854 | 0.03774 | 0.025976 | 0.010968 |
| 1976-12-01 | -0.00196 | -0.0275 | 0 | 0.037739 | 0.065703 |
| 1977-01-01 | 0.033306 | 0.010521 | 0 | 0.012272 | 0.016016 |
| 1977-02-01 | 0.007072 | -0.00286 | -0.16034 | -0.01227 | -0.00781 |
| 1977-03-01 | 0.017522 | -0.00191 | 0.265703 | 0.012272 | 0.006515 |
| 1977-04-01 | -0.01662 | 0.032913 | -0.0339 | -0.07599 | -0.00065 |
| 1977-05-01 | -0.01079 | 0.017424 | 0 | 0 | -0.04247 |
| 1977-06-01 | 0.014549 | 0.018019 | 0 | 0 | 0.01146 |
| 1977-07-01 | 0.035712 | -0.03822 | 0.033902 | 0.025976 | 0.00134 |
| 1977-08-01 | -0.01759 | -0.00745 | 0.03279 | 0.050011 | 0.032271 |
| 1977-09-01 | -0.02742 | 0.0028 | 0.031749 | 0.047626 | 0.037524 |
| 1977-10-01 | -0.01558 | -0.03124 | 0.060625 | 0.056512 | -0.00532 |
| 1977-11-01 | 0.007074 | -0.0155 | 0.084557 | -0.03352 | 0.003758 |
| 1977-12-01 | 0.045413 | 0.000976 | 0.052644 | 0.044453 | -0.00313 |
| 1978-01-01 | -0.02206 | 0.049487 | 0.16508 | 0.04256 | 0.038449 |
| 1978-02-01 | -0.00566 | 0.008322 | 0.122602 | -0.03175 | -0.04411 |
| 1978-03-01 | 0.026814 | 0.02725 | 0.056089 | -0.05526 | -0.01493 |
| 1978-04-01 | 0.041028 | 0.077558 | 0.15155 | 0 | -0.04954 |
| 1978-05-01 | 0.026259 | 0.018078 | 0.089612 | 0.055262 | 0.015685 |
| 1978-06-01 | 0.024242 | 0.021749 | 0.041964 | 0.052368 | 0.029687 |
| 1978-07-01 | 0.018436 | -0.0072 | 0 | 0.078473 | -0.00451 |
| 1978-08-01 | 0.055342 | 0.015924 | 0 | 0.046091 | 0.011238 |
| 1978-09-01 | 0.036746 | 0.036452 | 0.027029 | 0.008968 | -0.04273 |
| 1978-10-01 | 0.004364 | 0.025565 | 0.039221 | 0.00889 | -0.02976 |
| 1978-11-01 | -0.02965 | -0.00149 | 0.012739 | -0.06395 | 0.028762 |
| 1978-12-01 | 0.041187 | -0.00671 | 0.119189 | 0.027908 | 0.026659 |
| 1979-01-01 | 0.049196 | 0.003736 | 0.184192 | 0.087775 | 0.093271 |
| 1979-02-01 | 0.015701 | 0.015539 | 0.155485 | 0.057159 | -0.01791 |
| 1979-03-01 | 0.038034 | 0.039588 | 0.09894 | -0.0241 | 0.012274 |
| 1979-04-01 | 0.026981 | 0.031812 | 0.178692 | 0.008096 | 0.012419 |

| 1979-05-01 | 0.006498 | -0.00616 | -0.12234 | 0.062522 | -0.03712 | -0.00301 |
| --- | --- | --- | --- | --- | --- | --- |
| 1979-06-01 | 0.065699 | 0.022763 | -0.1008 | -0.01527 | 0.005474 | -0.05641 |
| 1979-07-01 | -0.00677 | -0.05696 | -0.0076 | 0 | 0.008757 | -0.03439 |
| 1979-08-01 | 0.031341 | -0.0411 | 0.059277 | 0.06694 | 0.020533 | 0.00461 |
| 1979-09-01 | 0.063439 | 0.026124 | -0.01449 | 0.089406 | 0.01433 | 0.010458 |
| 1979-10-01 | -0.04359 | 0.023321 | -0.0997 | 0.094113 | -0.02678 | 0.010993 |
| 1979-11-01 | -0.01082 | -0.01677 | 0.077558 | 0.029502 | -0.01563 | -0.10286 |
| 1979-12-01 | 0.077385 | -0.01987 | 0.007435 | 0.088946 | 0.005739 | 0.007102 |
| 1980-01-01 | 0.08125 | 0.046143 | 0.014706 | 0.061875 | 0.031429 | 0.032721 |
| 1980-02-01 | 0.092938 | 0.02711 | 0.007273 | 0.039222 | -0.02393 | 0.064967 |
| 1980-03-01 | -0.07837 | 0.023763 | -0.13976 | -0.01942 | -0.08579 | -0.03328 |
| 1980-04-01 | -0.05847 | 0.001162 | -0.0339 | -0.0198 | 0.03897 | -0.01538 |
| 1980-05-01 | 0.033778 | -0.0285 | 0.121607 | 0.024694 | 0.004376 | 0.010057 |
| 1980-06-01 | 0.071083 | -0.01113 | -0.03101 | 0.079667 | 0.027686 | 0.044365 |
| 1980-07-01 | 0.056174 | 0.018039 | -0.0484 | 0.094491 | 0.026644 | 0.060662 |
| 1980-08-01 | 0.036357 | 0.075909 | 0.024491 | 0.071177 | 0.002655 | 0.003597 |
| 1980-09-01 | 0.030111 | 0.008469 | -0.11075 | 0.087646 | -0.00206 | 0.021901 |
| 1980-10-01 | 0.003046 | -0.05361 | 0.061154 | -0.0035 | 0.014363 | 0.018562 |
| 1980-11-01 | -0.00548 | 0.026268 | 0.065597 | -0.05037 | -0.01348 | 0.037229 |
| 1980-12-01 | -0.00804 | 0.087099 | 0.126563 | -0.08066 | 0.009395 | -0.03608 |
| 1981-01-01 | -0.01006 | 0.02382 | 0.027588 | -0.08774 | -0.03964 | -0.03268 |
| 1981-02-01 | -0.02138 | 0.043765 | -0.04879 | -0.08186 | 0.013889 | 0.037257 |
| 1981-03-01 | 0.022898 | 0.063246 | -0.0438 | 0.032637 | -0.00964 | 0.017559 |
| 1981-04-01 | 0.041396 | 0.068556 | -0.01504 | 0.04485 | -0.02297 | 0.068881 |
| 1981-05-01 | -0.01345 | 0.010659 | -0.07878 | 0 | -0.04661 | 0.008351 |
| 1981-06-01 | 0.013601 | 0.066722 | -0.06782 | -0.11123 | 0.023417 | -0.02313 |
| 1981-07-01 | -0.00639 | 0.07462 | -0.05407 | -0.05543 | -0.00095 | -0.01393 |
| 1981-08-01 | -0.03516 | -0.03412 | -0.0474 | 0.060321 | -0.02996 | 0.046373 |
| 1981-09-01 | -0.11416 | -0.01842 | -0.06002 | 0.066061 | -0.08173 | -0.06763 |
| 1981-10-01 | -0.05673 | 0.056241 | -0.12036 | -0.0231 | -0.01106 | -0.07195 |
| 1981-11-01 | 0.013365 | 0.038894 | 0.045462 | -0.02844 | 0.039745 | 0.068638 |
| 1981-12-01 | 0.013722 | 0.006078 | 0.043485 | 0 | 0.003442 | 0.022411 |
| 1982-01-01 | -0.06991 | 0.070103 | -0.19949 | -0.03922 | -0.02189 | 0.02192 |
| 1982-02-01 | -0.07728 | -0.0208 | 0.012903 | -0.03563 | -0.0113 | 0.032261 |
| 1982-03-01 | -0.05428 | -0.00556 | -0.0129 | -0.15674 | -0.00142 | -0.00462 |
| 1982-04-01 | -0.0022 | -0.02239 | -0.23293 | 0.006042 | 0.01413 | 0.014808 |
| 1982-05-01 | -0.03702 | 0.031666 | -0.21905 | -0.05574 | -0.00105 | 0.03926 |
| 1982-06-01 | -0.07675 | -0.0477 | 0.133531 | -0.12899 | -0.04599 | -0.00195 |
| 1982-07-01 | -0.01413 | -0.04578 | -0.09353 | 0.056354 | -0.0059 | -0.00489 |
| 1982-08-01 | 0.051601 | 0.02581 | 0.057158 | 0.140357 | 0.017959 | 0.02184 |
| 1982-09-01 | 0.10008 | 0.024161 | 0.230524 | 0.112477 | 0.010119 | 0.069985 |

| 1982-10-01 | 0.059386 | 0.014669 | -0.04512 | 0.086569 | 0.06035 | 0.049344 |
| --- | --- | --- | --- | --- | --- | --- |
| 1982-11-01 | 0.06139 | 0.001299 | 0.143101 | -0.00489 | 0.032965 | 0.031043 |
| 1982-12-01 | 0.02 | 0.040172 | -0.1128 | 0.10683 | 0.045462 | -0.01876 |
| 1983-01-01 | 0.080296 | -0.0201 | 0.164755 | 0.124125 | 0.02106 | 0.018349 |
| 1983-02-01 | 0.028952 | -0.03078 | 0.09646 | -0.01569 | 0.034637 | 0.024894 |
| 1983-03-01 | 0.021234 | -0.02542 | -0.03509 | -0.09531 | 0.010894 | 0.017579 |
| 1983-04-01 | 0.048879 | -0.01774 | 0.090972 | 0.099255 | 0.027723 | 0.055088 |
| 1983-05-01 | 0.071698 | 0.089389 | 0.178692 | 0.031011 | -0.02597 | -0.01625 |
| 1983-06-01 | 0.001242 | 0.040914 | 0.255347 | -0.00766 | 0.017387 | 0.052321 |
| 1983-07-01 | 0.023237 | -0.02023 | 0.119347 | -0.00385 | 0.032503 | -0.01567 |
| 1983-08-01 | -0.01586 | 0.002662 | -0.01893 | 0.019121 | -0.02221 | 0.030026 |
| 1983-09-01 | 0.048832 | -0.00359 | 0.247059 | 0 | -0.00285 | -0.02089 |
| 1983-10-01 | -0.0421 | -0.0157 | -0.00499 | -0.10789 | 0.028947 | -0.0273 |
| 1983-11-01 | 0.001969 | 0.029706 | 0.019803 | -0.02564 | 0.039913 | 0.03093 |
| 1983-12-01 | 0.031371 | 0.022582 | 0.183138 | 0.075036 | 0.054389 | 0.01939 |
| 1984-01-01 | 0.006322 | 0.017521 | 0.321788 | 0.004009 | -0.00429 | 0.05702 |
| 1984-02-01 | -0.05885 | -0.00358 | 0.175891 | 0.046883 | -0.02798 | -0.00235 |
| 1984-03-01 | -0.0029 | -0.01599 | -0.18481 | 0.066446 | -0.00156 | 0.062959 |
| 1984-04-01 | -0.02859 | -0.01762 | -0.1477 | -0.01439 | 0.02904 | 0.019412 |
| 1984-05-01 | -0.02546 | -0.01722 | 0.126587 | -0.00727 | -0.04613 | -0.01832 |
| 1984-06-01 | -0.01245 | 0.02823 | -0.03096 | -0.01101 | -0.0104 | -0.03703 |
| 1984-07-01 | -0.03605 | 0.050502 | 0.037041 | -0.09273 | -0.01186 | -0.03718 |
| 1984-08-01 | 0.075314 | -0.02125 | 0.161913 | -0.00406 | 0.048441 | 0.060849 |
| 1984-09-01 | 0.019051 | 0.027063 | 0.118928 | -0.01639 | 0.010794 | 0.032072 |
| 1984-10-01 | -0.00056 | 0.0652 | -0.08847 | 0.032524 | 0.012448 | 0.014568 |
| 1984-11-01 | 0.008923 | -0.03631 | 0.04879 | 0.050693 | 0.004534 | 0.035279 |
| 1984-12-01 | -0.01159 | 0.002643 | -0.03884 | -0.02698 | 0.01818 | 0.028106 |
| 1985-01-01 | 0.030887 | 0.054278 | -0.08521 | -0.04721 | 0.060102 | 0.042708 |
| 1985-02-01 | 0.062701 | 0.070637 | 0.124053 | -0.0165 | -0.00163 | 0.017219 |
| 1985-03-01 | 0.002126 | 0.067594 | 0.044245 | 0.024692 | 0 | 0.010271 |
| 1985-04-01 | 0.007875 | 0.107747 | 0.091368 | 0.107771 | 0.032294 | -0.00259 |
| 1985-05-01 | 0.018994 | 0.059082 | -0.04682 | 0.039386 | 0.03499 | 0.025628 |
| 1985-06-01 | 0.014893 | 0.141406 | 0.075508 | 0.003476 | 0.052153 | -0.02702 |
| 1985-07-01 | 0.015268 | 0.104309 | 0.139323 | -0.00696 | 0.01517 | -0.03227 |
| 1985-08-01 | 0.008489 | 0.030202 | 0.16935 | -0.0359 | 0.05752 | 0.043255 |
| 1985-09-01 | -0.02611 | -0.05831 | 0.077071 | 0.049861 | -0.04539 | 0.004985 |
| 1985-10-01 | -0.02659 | -0.00252 | 0.276632 | 0.037506 | 0.10105 | 0.018959 |
| 1985-11-01 | 0.052139 | 0.016844 | 0.120557 | 0.039651 | 0.065231 | 0.057552 |
| 1985-12-01 | 0.030825 | 0.088884 | 0.0327 | 0.030144 | 0.07948 | -0.0118 |
| 1986-01-01 | -0.01011 | 0.100391 | 0.238221 | 0.058656 | -0.04749 | 0.006637 |
| 1986-02-01 | -0.01605 | 0.097969 | -0.00707 | -0.02078 | -0.01696 | 0.055787 |

| 1986-03-01 | 0.062387 | -0.09319 | -0.05841 | 0.029568 | 0.071494 | 0.087933 |
| --- | --- | --- | --- | --- | --- | --- |
| 1986-04-01 | 0.035495 | 0.027611 | -0.03832 | -0.04163 | 0.026192 | 0.031058 |
| 1986-05-01 | -0.00602 | 0.00389 | 0.138402 | 0.023979 | -0.0161 | -0.03885 |
| 1986-06-01 | 0.002613 | 0.054114 | 0.078472 | 0.035328 | -0.0184 | 0.003039 |
| 1986-07-01 | -0.0257 | -0.03582 | 0.193786 | 0.033464 | -0.07635 | -0.00905 |
| 1986-08-01 | 0.005424 | -0.08531 | 0.144482 | 0.095062 | 0.097378 | -0.00674 |
| 1986-09-01 | 0.005048 | 0.000712 | 0.24882 | 0.091432 | -0.03994 | 0.024348 |
| 1986-10-01 | -0.00233 | 0.020426 | 0.207639 | 0.018236 | 0.047766 | -0.01968 |
| 1986-11-01 | 0.009091 | -0.08019 | 0.169455 | -0.0091 | 0.034717 | 0.026965 |
| 1986-12-01 | -0.00042 | -0.03773 | 0.121772 | 0.004565 | 0.000886 | 0.001269 |
| 1987-01-01 | 0.061756 | 0.082097 | 0.246727 | 0.072161 | -0.03285 | 0.073147 |
| 1987-02-01 | 0.076247 | 0.027905 | 0.280774 | -0.00635 | -0.04348 | 0.081594 |
| 1987-03-01 | 0.058022 | -0.07201 | 0.210485 | 0.01686 | 0.012033 | 0.047824 |
| 1987-04-01 | 0.021493 | -0.03602 | 0.216217 | 0.097379 | -0.0218 | -0.01743 |
| 1987-05-01 | -0.00925 | -0.08699 | 0.158533 | 0.039002 | -0.0123 | 0.085797 |
| 1987-06-01 | -0.01023 | -0.05038 | 0.120547 | -0.03187 | 0.036926 | 0.05306 |
| 1987-07-01 | 0.056861 | 0.076595 | 0.339349 | 0.053495 | 0.068093 | 0.043579 |
| 1987-08-01 | 0.028307 | 0.02445 | 0.235969 | 0.060533 | 0.006576 | -0.04773 |
| 1987-09-01 | -0.02926 | -0.04593 | 0.178429 | 0.00332 | 0.04123 | 0.019534 |
| 1987-10-01 | -0.13361 | -0.03001 | -0.54089 | -0.08003 | -0.28215 | -0.09557 |
| 1987-11-01 | -0.14941 | -0.05489 | -0.56547 | -0.30228 | -0.11746 | -0.23874 |
| 1987-12-01 | 0.048564 | -0.02295 | -0.07263 | -0.01481 | -0.0264 | 0.016732 |
| 1988-01-01 | 0.012732 | 0.076023 | 0.278603 | -0.02517 | -0.00515 | 0.053731 |
| 1988-02-01 | -0.01835 | -0.07719 | 0.362339 | -0.11333 | 0.079563 | -0.01183 |
| 1988-03-01 | 0.065211 | -0.03598 | -0.13991 | 0.033708 | -0.02352 | 0.034308 |
| 1988-04-01 | 0.016781 | 0.049457 | -0.12336 | 0.008321 | 0.007093 | -0.01166 |
| 1988-05-01 | -0.03502 | 0.19136 | 0.198823 | -0.00865 | -0.00791 | -0.00224 |
| 1988-06-01 | 0.045687 | 0.139802 | -0.00801 | 0.03842 | 0.050407 | 0.035642 |
| 1988-07-01 | 0.007731 | -0.02479 | 0.008061 | 0.063872 | 0.015745 | 0.004786 |
| 1988-08-01 | -0.03611 | 0.028178 | 0.043897 | -0.05344 | 0.00532 | -0.01401 |
| 1988-09-01 | -0.00688 | 0.051029 | 0.006846 | 0.01824 | 0.02766 | -0.0313 |
| 1988-10-01 | 0.032586 | 0.080126 | -0.00025 | 0.052836 | 0.027454 | 0.03818 |
| 1988-11-01 | -0.03181 | 0.029026 | 0.148894 | 0.010772 | -0.01718 | -0.01358 |
| 1988-12-01 | 0.016213 | -0.03397 | -0.08188 | 0.030184 | 0.021122 | -0.02694 |
| 1989-01-01 | 0.05189 | -0.04306 | -0.00626 | 0.051078 | 0.008487 | 0.066686 |
| 1989-02-01 | 0.032087 | 0.021075 | -0.00908 | 0.031246 | 0.004435 | 0.07798 |
| 1989-03-01 | -0.00724 | 0.020758 | 0.107796 | 0.079799 | 0.019716 | 0.014012 |
| 1989-04-01 | -0.00395 | 0.102808 | 0.12049 | 0.016263 | 0.037258 | -0.00407 |
| 1989-05-01 | 0.017504 | -0.03837 | 0.146221 | -0.04747 | -0.02219 | 0.033775 |
| 1989-06-01 | 0.032102 | 0.024665 | 0.140075 | 0.033092 | 0.063135 | 0.005022 |
| 1989-07-01 | 0.025475 | 0.023437 | 0.016393 | 0.045503 | 0.059385 | 0.045294 |

| 1989-08-01 | 0.032857 | -0.05013 | 0.120611 | 0.046925 | 0.072892 | 0.046577 |
| --- | --- | --- | --- | --- | --- | --- |
| 1989-09-01 | -0.01308 | 0.009577 | 0.067738 | -0.01094 | -0.00794 | 0.00952 |
| 1989-10-01 | 0.005075 | 0.00815 | -0.06599 | -0.048 | -0.0453 | -0.07668 |
| 1989-11-01 | -0.00454 | -0.02436 | -0.03977 | 0.067674 | -0.03874 | 0.002038 |
| 1989-12-01 | 0.005404 | 0.054948 | 0.08511 | 0.054342 | 0.026618 | 0.067071 |
| 1990-01-01 | -0.06618 | -0.01174 | 0.059808 | 0.027929 | -0.00094 | 0.003935 |
| 1990-02-01 | -0.00479 | -0.09587 | 0.061625 | 0.006655 | -0.00943 | -0.03038 |
| 1990-03-01 | -0.01289 | 0.046085 | 0.034492 | -0.01502 | -0.0269 | -0.02132 |
| 1990-04-01 | -0.0856 | 0.093273 | 0.07093 | -0.04986 | -0.02965 | -0.02577 |
| 1990-05-01 | 0.069648 | 0.006872 | 0.152746 | 0.022048 | 0.042225 | 0.017746 |
| 1990-06-01 | -0.01066 | 0.021248 | 0.024324 | -0.02903 | 0.053358 | 0.063574 |
| 1990-07-01 | 0.004842 | 0.156093 | 0.035145 | 0.027623 | 0.013581 | -0.00636 |
| 1990-08-01 | -0.06224 | 0.173935 | -0.04906 | 0.026893 | -0.14386 | -0.07326 |
| 1990-09-01 | -0.05747 | 0.158439 | -0.10468 | -0.08774 | -0.08108 | -0.05335 |
| 1990-10-01 | -0.02504 | 0.034709 | 0.042203 | -0.0723 | -0.02509 | 0.00521 |
| 1990-11-01 | 0.022413 | -0.03604 | 0.055456 | -0.01847 | -0.03765 | -0.00106 |
| 1990-12-01 | 0.032994 | -0.11701 | 0.039987 | 0.034547 | 0.017826 | 0.034993 |
| 1991-01-01 | 0.004962 | -0.15359 | -0.06497 | -0.03778 | -0.0372 | -0.02691 |
| 1991-02-01 | 0.056246 | 0.099575 | 0.079129 | 0.035273 | 0.116424 | 0.078363 |
| 1991-03-01 | 0.00958 | 0.070055 | 0.127639 | 0.067341 | 0.05504 | 0.072553 |
| 1991-04-01 | -0.0077 | 0.061301 | 0.184907 | 0.035076 | 0.035411 | 0.025935 |
| 1991-05-01 | 0.022039 | 0.029382 | 0.132257 | 0.014967 | 0.005946 | -0.00833 |
| 1991-06-01 | -0.02293 | 0.00187 | 0.073201 | 0.068339 | 0.012764 | 0.000728 |
| 1991-07-01 | 0.021076 | 0.106551 | 0.06652 | 0.044831 | 0.001949 | 0.013918 |
| 1991-08-01 | -0.00616 | 0.179365 | 0.018453 | -0.00309 | 0 | 0.027443 |
| 1991-09-01 | -0.03766 | 0.061586 | 0.069754 | -0.00376 | -0.00978 | 0.008295 |
| 1991-10-01 | 0.037051 | -0.02444 | 0.048127 | 0.006591 | -0.0079 | -0.01588 |
| 1991-11-01 | -0.01931 | 0.05494 | 0.048576 | 0.031916 | -0.00198 | -0.0298 |
| 1991-12-01 | 0.018346 | -0.00945 | -0.0312 | -0.02145 | -0.04572 | -0.03849 |
| 1992-01-01 | 0.023567 | 0.102113 | 0.136153 | 0.040126 | 0.0683 | 0.044501 |
| 1992-02-01 | -0.00395 | 0.172812 | 0.112627 | -0.00501 | 0.026822 | 0.009134 |
| 1992-03-01 | -0.04856 | 0.346989 | 0.050965 | -0.02395 | 0.009407 | -0.01908 |
| 1992-04-01 | -0.01672 | 0.169434 | 0.000832 | -0.04087 | 0.012099 | 0.021492 |
| 1992-05-01 | 0.0096 | -0.20463 | 0.001151 | 0.073074 | 0.041673 | 0.058241 |
| 1992-06-01 | -6.8E-05 | -0.08618 | -0.05616 | 0.006298 | -0.02153 | -0.0369 |
| 1992-07-01 | 0.016314 | -0.09907 | -0.07315 | -0.06196 | -0.02851 | -0.06389 |
| 1992-08-01 | -0.01183 | 0.011619 | -0.0865 | -0.08137 | -0.02647 | -0.04143 |
| 1992-09-01 | -0.03135 | 0.136273 | -0.11328 | -0.00905 | 0.021791 | 0.045167 |
| 1992-10-01 | 0.011529 | -0.05314 | 0.122417 | -0.03026 | 0.009328 | 0.053463 |
| 1992-11-01 | -0.0161 | -0.1618 | 0.093651 | 0.002578 | 0.004632 | 0.047491 |
| 1992-12-01 | 0.020386 | -0.03117 | 0.054214 | 0.064998 | 0.03986 | 0.023708 |

| 1993-01-01 | -0.01351 | -0.00107 | 0.023955 | 0.045019 | 0.045995 | 0.004413 |
| --- | --- | --- | --- | --- | --- | --- |
| 1993-02-01 | 0.043285 | 0.067123 | -0.10321 | 0.022668 | 0.025954 | 0.017718 |
| 1993-03-01 | 0.042747 | -0.12173 | 0.042695 | -0.00099 | 0.022877 | 0.019806 |
| 1993-04-01 | 0.050599 | -0.07964 | 0.038273 | 0.04481 | 0.011245 | -0.02076 |
| 1993-05-01 | 0.024315 | 0.014942 | -0.06137 | 0.064699 | 0.018204 | -0.00259 |
| 1993-06-01 | 0.021326 | 0.014981 | -0.00917 | 0.021465 | 0.050469 | 0.015627 |
| 1993-07-01 | 0.000217 | -0.04097 | 0.058588 | 0.03199 | 0.030839 | -0.00837 |
| 1993-08-01 | 0.042036 | 0.154449 | 0.081075 | -0.01361 | 0.03202 | 0.057441 |
| 1993-09-01 | -0.03616 | 0.057848 | 0.008695 | -0.05527 | -0.0141 | 0.002872 |
| 1993-10-01 | 0.064278 | -0.00734 | 0.036926 | 0.014931 | 0.068614 | 0.031593 |
| 1993-11-01 | -0.01786 | 0.058432 | 0.08433 | 0.058476 | 0.047273 | -0.00435 |
| 1993-12-01 | 0.033225 | 0.147041 | 0.146291 | 0.092252 | 0.054766 | 0.062927 |
| 1994-01-01 | 0.052606 | 0.144122 | 0.065355 | 0.074619 | 0.060977 | 0.034877 |
| 1994-02-01 | -0.02918 | 0.057496 | 0.048618 | -0.017 | 0.002251 | -0.01022 |
| 1994-03-01 | -0.02153 | -0.05814 | -0.0975 | 0.049058 | -0.05369 | -0.05766 |
| 1994-04-01 | -0.01454 | 0.003536 | -0.1191 | -0.00659 | -0.00774 | -0.02373 |
| 1994-05-01 | 0.013882 | -0.01811 | 0.052666 | 0.078544 | -0.03838 | -0.01341 |
| 1994-06-01 | -0.07223 | 0.096268 | 0.000712 | 0.0347 | -0.00999 | -0.03588 |
| 1994-07-01 | 0.037478 | -0.00697 | -0.00944 | -0.01668 | -0.04033 | 0.01869 |
| 1994-08-01 | 0.039996 | 0.070604 | 0.14363 | 0.052739 | 0.011043 | 0.04568 |
| 1994-09-01 | 0.001075 | 0.023287 | 0.034725 | 0.004832 | 0.008363 | -0.02554 |
| 1994-10-01 | -0.01447 | -0.03613 | -0.03383 | -0.02555 | -0.03322 | -0.01679 |
| 1994-11-01 | -0.04729 | -0.04997 | -0.05921 | 0.035097 | 0.015117 | 0.013072 |
| 1994-12-01 | 0.028941 | -0.04681 | -0.0532 | -0.01696 | 0.009091 | -0.01971 |
| 1995-01-01 | -0.04766 | -0.07847 | -0.11423 | -0.04306 | -0.0117 | 0.000553 |
| 1995-02-01 | 0.026365 | -0.04962 | -0.15797 | -0.05541 | 0.009763 | 0.007691 |
| 1995-03-01 | 0.044755 | -0.01936 | -0.10835 | 0.006783 | -0.0356 | 0.008667 |
| 1995-04-01 | -0.00795 | -0.01449 | 0.157639 | 0.029557 | 0.011345 | 0.038286 |
| 1995-05-01 | 0.038769 | -0.04667 | 0.05633 | 0.029298 | 0.059883 | 0.027731 |
| 1995-06-01 | 0.017494 | 0.039858 | 0.010729 | -0.02523 | 0.035608 | 0.019048 |
| 1995-07-01 | 0.01923 | -0.00048 | 0.176311 | -0.01141 | 0.013182 | 0.022115 |
| 1995-08-01 | -0.02154 | 0.020171 | 0.026177 | 0.019922 | 0.005935 | 0.017491 |
| 1995-09-01 | 0.002885 | -0.00189 | 0.013986 | 0.014005 | 0.040017 | 0.013478 |
| 1995-10-01 | -0.01571 | 0.038052 | -0.09332 | 0.029367 | 0.019702 | -0.0007 |
| 1995-11-01 | 0.044308 | -0.10639 | 0.041155 | 0.033262 | 0.024774 | 0.013643 |
| 1995-12-01 | 0.011171 | -0.03594 | 0.120448 | 0.03445 | 0.033158 | 0.019058 |
| 1996-01-01 | 0.052665 | -0.02674 | 0.103056 | 0.091092 | 0.011655 | 0.018325 |
| 1996-02-01 | -0.00701 | 0.133718 | -0.01281 | 0.013492 | 0.001707 | 0.005739 |
| 1996-03-01 | 0.007494 | -0.02324 | -0.01498 | -0.02467 | 0.085106 | -0.01091 |
| 1996-04-01 | 0.034724 | 0.078669 | 0.079764 | 0.021466 | 0.001375 | 0.02532 |
| 1996-05-01 | 0.019231 | 0.036158 | 0.025539 | -0.00866 | -0.01373 | -0.00898 |

| 1996-06-01 | -0.03933 | 0.0457 | -0.01444 | 0.001728 | 0.011564 | -0.00651 |
| --- | --- | --- | --- | --- | --- | --- |
| 1996-07-01 | -0.02305 | -0.06299 | -0.05161 | -0.00341 | 0.004261 | -0.00721 |
| 1996-08-01 | 0.042554 | -0.06157 | 0.07966 | -0.02873 | -0.00236 | 0.035649 |
| 1996-09-01 | 0.0283 | -0.01727 | 0.003724 | 0.035393 | 0.004051 | 0.021971 |
| 1996-10-01 | 0.056535 | -0.07036 | -0.00475 | 0.019407 | 0.026771 | 0.023627 |
| 1996-11-01 | 0.071978 | -0.03724 | 0.008053 | -0.03436 | 0.015437 | -0.01288 |
| 1996-12-01 | -0.01501 | -0.04213 | -0.00217 | -0.03063 | 0.007485 | 0.017318 |
| 1997-01-01 | 0.030335 | 0.155669 | 0.090612 | 0.023308 | 0.043706 | 0.030535 |
| 1997-02-01 | 0.007868 | 0.012513 | 0.046781 | 0.04721 | 0.088019 | 0.035957 |
| 1997-03-01 | -0.05125 | 0.085779 | 0.00017 | 0.011008 | 0.026543 | 0.007665 |
| 1997-04-01 | 0.021378 | -0.02177 | -0.00482 | -0.01055 | 0.016428 | -0.00861 |
| 1997-05-01 | 0.065643 | 0.016019 | 0.033551 | 0.014073 | 0.084957 | 0.069441 |
| 1997-06-01 | 0.008677 | 0.067327 | 0.088568 | 0.016118 | 0.060113 | 0.005777 |
| 1997-07-01 | 0.066104 | 0.061689 | 0.106154 | 0.01784 | 0.069932 | 0.040766 |
| 1997-08-01 | -0.03943 | 0.004737 | 0.055313 | 0.017314 | -0.02507 | 0.020986 |
| 1997-09-01 | 0.062786 | -0.0807 | 0.002421 | -0.02847 | -0.01452 | 0.013017 |
| 1997-10-01 | -0.02851 | 0.011836 | 0.020521 | -0.03469 | 0.028524 | 0.026544 |
| 1997-11-01 | -0.04937 | -0.10002 | -0.08738 | -0.05994 | -0.03203 | -0.05985 |
| 1997-12-01 | 0.028258 | -0.02703 | 0.074372 | -0.0578 | 0.070821 | 0.048591 |
| 1998-01-01 | 0.000113 | -0.0122 | -0.07323 | 0.003744 | 0.044193 | 0.029928 |
| 1998-02-01 | 0.056899 | -0.02041 | -0.00839 | 0.097183 | 0.084496 | 0.076008 |
| 1998-03-01 | 0.063636 | 0.117101 | 0.042003 | 0.060899 | 0.058377 | 0.035727 |
| 1998-04-01 | 0.01399 | 0.071595 | 0.030146 | 0.089401 | 0.025798 | 0.019045 |
| 1998-05-01 | -0.00986 | -0.04923 | -0.06366 | 0.028957 | 0.01597 | -0.00634 |
| 1998-06-01 | -0.02981 | -0.16483 | -0.07981 | -0.11605 | -0.00142 | -0.01526 |
| 1998-07-01 | -0.06093 | -0.01389 | 0.035034 | -0.01404 | 0.064198 | 0.024084 |
| 1998-08-01 | -0.22575 | -0.09058 | -0.23009 | -0.15671 | -0.07779 | -0.07515 |
| 1998-09-01 | 0.014969 | 0.033394 | -0.06088 | -0.20221 | -0.15131 | -0.07199 |
| 1998-10-01 | 0.100599 | -0.07505 | 0.097018 | 0.076971 | -0.08111 | -0.02072 |
| 1998-11-01 | 0.021605 | 0.015895 | 0.093208 | 0.09241 | 0.14205 | 0.099852 |
| 1998-12-01 | 0.022148 | 0.011471 | -0.05775 | -0.10488 | 0.009069 | 0.016076 |
| 1999-01-01 | 0.036873 | 0.109559 | -0.04285 | 0.078294 | 0.047357 | 0.049672 |
| 1999-02-01 | -0.06395 | -0.00103 | 0.110893 | 0.037295 | -0.02403 | 0.005831 |
| 1999-03-01 | 0.044173 | 0.116491 | 0.120552 | 0.079183 | 0.013259 | 0.025908 |
| 1999-04-01 | 0.061273 | -0.06841 | 0.141165 | 0.052349 | 0.020278 | 0.046145 |
| 1999-05-01 | -0.02496 | 0.118902 | 0.069546 | 0.008947 | -0.01643 | -0.02157 |
| 1999-06-01 | 0.024297 | 0.046904 | -0.03952 | 0.021967 | 0.001364 | 0.016283 |
| 1999-07-01 | 0.010072 | 0.107029 | 0.041801 | 0.027237 | -0.00218 | -0.00047 |
| 1999-08-01 | -0.01569 | 0.02973 | -0.1012 | -0.00077 | -0.00979 | -0.03355 |
| 1999-09-01 | -0.00188 | 0.013235 | -0.04031 | -0.05703 | 0.017114 | -0.01525 |
| 1999-10-01 | 0.042007 | 0.02312 | 0.027231 | 0.04773 | -0.01364 | -0.00751 |

| 1999-11-01 | 0.036137 | -0.05313 | 0.167347 | 0.034653 | 0.04925 | 0.066321 |
| --- | --- | --- | --- | --- | --- | --- |
| 1999-12-01 | 0.111872 | 0.04619 | 0.110751 | 0.081868 | 0.014902 | 0.035184 |
| 2000-01-01 | 0.004839 | 0.118337 | 0.035439 | -0.00617 | -0.00203 | -0.03427 |
| 2000-02-01 | 0.082969 | 0.044398 | 0.050409 | -0.03889 | -0.02543 | -0.04971 |
| 2000-03-01 | 0.042289 | -0.07394 | 0.076167 | -0.06281 | 0.021231 | 0.057082 |
| 2000-04-01 | -0.04771 | -0.06732 | -0.14666 | -0.0698 | 0.030844 | -0.03673 |
| 2000-05-01 | 0.017372 | -0.13873 | -0.1171 | -0.00176 | 0.030183 | -0.01437 |
| 2000-06-01 | 0.068229 | 0.090539 | 0.067171 | 0.037477 | 0.008975 | 0.037799 |
| 2000-07-01 | 0.059701 | -0.00603 | 0.077528 | 0.027197 | 0.025221 | -0.00338 |
| 2000-08-01 | 0.033947 | -0.07163 | -0.08865 | 0.040943 | 0.040857 | 0.007793 |
| 2000-09-01 | -0.01058 | 0.021369 | 0.032924 | 0.024058 | -0.02262 | -0.00325 |
| 2000-10-01 | -0.06423 | -0.14264 | -0.09728 | -0.03396 | -0.0216 | -0.0265 |
| 2000-11-01 | -0.09793 | 0.024769 | 0.013939 | 0.011453 | 0.030261 | 0.010622 |
| 2000-12-01 | -0.01976 | 0.036239 | -0.09136 | -0.00526 | -0.01385 | -0.0209 |
| 2001-01-01 | -0.00703 | 0.021149 | 0.083427 | 0.062382 | -0.00605 | -0.00556 |
| 2001-02-01 | -0.0303 | 0.035424 | 0.03089 | 0.060459 | -0.01739 | -0.0124 |
| 2001-03-01 | -0.09949 | -0.12169 | -0.06062 | -0.05737 | -0.08454 | -0.06849 |
| 2001-04-01 | -0.00778 | -0.0932 | -0.00394 | -0.00964 | -0.01327 | 0.009469 |
| 2001-05-01 | 0.04315 | 0.037547 | 0.071888 | 0.072506 | 0.048819 | 0.01886 |
| 2001-06-01 | -0.03027 | -0.04845 | 0.047276 | 0.001628 | -0.02663 | -0.02141 |
| 2001-07-01 | -0.03198 | -0.02716 | -0.0135 | -0.05215 | -0.05958 | -0.05184 |
| 2001-08-01 | -0.00683 | -0.01234 | -0.01225 | -0.00095 | -0.03071 | -0.00309 |
| 2001-09-01 | -0.08585 | -0.12469 | -0.15477 | -0.07362 | -0.13825 | -0.10818 |
| 2001-10-01 | -0.00823 | 0.004482 | 0.003974 | 0.044148 | 0.017156 | 0.034755 |
| 2001-11-01 | 0.05143 | 0.078438 | 0.024819 | 0.068451 | 0.050857 | 0.035392 |
| 2001-12-01 | 0.035284 | 0.043885 | 0.085934 | 0.123526 | -0.00104 | -0.01178 |
| 2002-01-01 | 0.015983 | 0.012148 | 0.062803 | 0.035751 | -0.00045 | 0.002136 |
| 2002-02-01 | -0.01724 | 0.050945 | 0.010838 | 0.023967 | -0.01179 | -0.01264 |
| 2002-03-01 | 0.042244 | 0.012331 | 0.080117 | 0.024918 | 0.044756 | 0.02438 |
| 2002-04-01 | -0.01219 | -0.03917 | 0.022173 | 0.017319 | 0.015709 | -0.00842 |
| 2002-05-01 | -0.01358 | -0.03879 | -0.0053 | 0.010507 | -0.00798 | -0.00771 |
| 2002-06-01 | -0.04684 | -0.01445 | -0.09864 | -0.04183 | -0.0798 | -0.08089 |
| 2002-07-01 | -0.08494 | -0.01303 | -0.06692 | -0.08191 | -0.11566 | -0.11773 |
| 2002-08-01 | -0.01807 | -0.05209 | -0.0364 | -0.06602 | -0.02267 | 0.0056 |
| 2002-09-01 | -0.03599 | 0.011093 | -0.00438 | 0.018926 | -0.07412 | -0.0743 |
| 2002-10-01 | -0.03421 | -0.04413 | -0.01542 | -0.01242 | -0.02484 | 0.003081 |
| 2002-11-01 | 0.048222 | 0.033967 | 0.002576 | 0.014108 | 0.044135 | 0.033 |
| 2002-12-01 | 0.023377 | 0.082592 | 0.03622 | -0.03011 | -0.03229 | -0.03819 |
| 2003-01-01 | 0.016461 | 0.003052 | 0.003822 | -0.00474 | -0.03376 | -0.04001 |
| 2003-02-01 | -0.02921 | -0.01526 | -0.04788 | -0.0767 | -0.0979 | -0.04023 |
| 2003-03-01 | -0.02281 | -0.04055 | 0.010841 | -0.07134 | -0.03777 | -0.00165 |

| 2003-04-01 | 0.017364 | -0.03707 | 0.053262 | -0.03463 | 0.091828 | 0.060638 |
| --- | --- | --- | --- | --- | --- | --- |
| 2003-05-01 | 0.036825 | -0.0008 | 0.043424 | 0.036719 | 0.022017 | 0.030839 |
| 2003-06-01 | 0.043428 | 0.11131 | 0.065464 | 0.076761 | 0.056906 | 0.032892 |
| 2003-07-01 | 0.014092 | 0.079042 | 0.026193 | -0.00497 | 0.016144 | -0.0099 |
| 2003-08-01 | 0.033606 | 0.081111 | 0.032895 | 0.046004 | 0.038768 | 0.024887 |
| 2003-09-01 | 0.026287 | 0.081972 | 0.046581 | 0.030981 | 0.034747 | 0.012611 |
| 2003-10-01 | 0.01262 | 0.0913 | 0.016265 | 0.017785 | -0.01052 | 0.013013 |
| 2003-11-01 | 0.020055 | 0.046099 | 0.061801 | 0.025985 | 0.01823 | 0.013656 |
| 2003-12-01 | 0.02917 | 0.09326 | 0.017481 | 0.028363 | 0.024146 | 0.010853 |
| 2004-01-01 | 0.050301 | 0.090342 | 0.078794 | 0.074469 | 0.045007 | 0.016728 |
| 2004-02-01 | 0.025048 | -0.02171 | 0.066964 | 0.004572 | 0.033811 | -0.00627 |
| 2004-03-01 | -0.00746 | -0.03463 | 0.021807 | -0.00185 | -0.02009 | 0.000808 |
| 2004-04-01 | 0.004142 | 0.034188 | 0.047421 | -0.00665 | 0.0164 | 0.014835 |
| 2004-05-01 | -0.04558 | -0.11134 | -0.06965 | -0.056 | -0.01472 | -0.01325 |
| 2004-06-01 | 0.019863 | -0.07598 | 0.027862 | 0.003566 | -0.00206 | 0.005499 |
| 2004-07-01 | -0.00061 | 0.030423 | -0.01237 | -0.01189 | -0.02752 | -0.02616 |
| 2004-08-01 | -0.01684 | 0.033865 | 0.00224 | 0.058673 | -0.02293 | 0.005675 |
| 2004-09-01 | 0.024592 | 0.052837 | 0.058792 | 0.061951 | 0.021196 | 0.038721 |
| 2004-10-01 | 0.034849 | 0.048865 | 0.043037 | 0.036955 | -0.01268 | 0.018343 |
| 2004-11-01 | 0.015787 | 0.046223 | 0.066095 | 0.033007 | 0.023802 | 0.021084 |
| 2004-12-01 | 0.022544 | 0.069547 | 0.049614 | 0.017447 | 0.010223 | 0.001413 |
| 2005-01-01 | -0.00463 | -0.0157 | 0.019702 | 0.019715 | 0.021803 | 0.015674 |
| 2005-02-01 | 0.046686 | 0.046684 | 0.063306 | 0.038798 | 0.026648 | 0.035239 |
| 2005-03-01 | 0.016655 | 0.011136 | -0.02526 | 0.021996 | 0.013117 | -0.00815 |
| 2005-04-01 | -0.02244 | -0.04374 | -0.07546 | -0.03432 | -0.00199 | -0.01434 |
| 2005-05-01 | -0.00038 | 0.015413 | 0.03467 | 0.016768 | 0.008394 | 0.007726 |
| 2005-06-01 | 0.040238 | 0.067266 | 0.050429 | 0.066579 | 0.037023 | 0.024973 |
| 2005-07-01 | 0.036924 | 0.058233 | 0.045875 | 0.041561 | 0.030721 | 0.034591 |
| 2005-08-01 | 0.032112 | 0.050199 | 0.040368 | 0.052006 | 0.027261 | 0.015068 |
| 2005-09-01 | 0.032249 | 0.066296 | 0.054352 | 0.041216 | 0.023391 | 0.015916 |
| 2005-10-01 | -0.03903 | -0.00265 | -0.00212 | -0.00201 | 0.024759 | -0.01865 |
| 2005-11-01 | 0.023846 | 0.030479 | 0.062608 | 0.05734 | 0.051658 | 0.030745 |
| 2005-12-01 | 0.037677 | 0.076115 | 0.074714 | 0.031026 | 0.028115 | 0.016974 |
| 2006-01-01 | 0.042554 | 0.040634 | 0.060821 | 0.061096 | 0.026844 | 0.027593 |
| 2006-02-01 | 0.010742 | 0.055624 | -0.00567 | 0.034672 | 0.022617 | 0.017333 |
| 2006-03-01 | 0.016971 | 0.073262 | 0.023054 | 0.012723 | 0.014281 | 0.02249 |
| 2006-04-01 | 0.026152 | 0.074807 | 0.041664 | 0.060519 | 0.011603 | 0.018865 |
| 2006-05-01 | -0.03161 | -0.00752 | 0.025421 | 0.004684 | -0.0291 | -0.03371 |
| 2006-06-01 | -0.04866 | -0.15803 | -0.11394 | -0.04768 | -0.04938 | -0.03182 |
| 2006-07-01 | 0.027431 | 0.062955 | 0.076359 | 0.041808 | 0.032696 | 0.028801 |
| 2006-08-01 | 0.03162 | 0.068475 | 0.050581 | 0.018327 | 0.038241 | 0.007531 |

| 2006-09-01 | -0.02045 | 0.062598 | 0.035892 | 0.029408 | 0.032695 | 0.003114 |
| --- | --- | --- | --- | --- | --- | --- |
| 2006-10-01 | 0.014327 | 0.047655 | 0.059098 | 0.049089 | 0.040369 | 0.034222 |
| 2006-11-01 | 0.038134 | 0.060901 | 0.061504 | 0.031944 | 0.016007 | 0.010821 |
| 2006-12-01 | 0.033112 | 0.015169 | 0.062431 | 0.022087 | 0.002376 | 0.000903 |
| 2007-01-01 | -0.00678 | 0.027337 | 0.032927 | 0.029897 | 0.041743 | 0.010269 |
| 2007-02-01 | 0.034868 | 0.011013 | 0.05631 | 0.045765 | 0.026456 | 0.019946 |
| 2007-03-01 | -0.01374 | -0.09506 | -0.02909 | -0.00286 | -0.03821 | -0.02498 |
| 2007-04-01 | 0.037942 | 0.043956 | 0.077063 | 0.069856 | 0.042437 | 0.035632 |
| 2007-05-01 | 0.029647 | 0.049581 | 0.026425 | 0.017082 | 0.018251 | 0.021604 |
| 2007-06-01 | -0.00014 | 0.014231 | 0.044578 | 0.012271 | -0.01358 | 0.004055 |
| 2007-07-01 | 0.017686 | 0.062148 | 0.001737 | 0.014364 | -0.01241 | -0.00548 |
| 2007-08-01 | -0.0555 | -0.03094 | -0.07247 | -0.06464 | -0.04854 | -0.06011 |
| 2007-09-01 | 0.031972 | 0.081598 | 0.030699 | 0.063175 | 0.010495 | 0.026515 |
| 2007-10-01 | 0.025826 | 0.139569 | 0.048219 | 0.055796 | 0.025959 | 0.039275 |
| 2007-11-01 | -0.03417 | 0.042976 | -0.08437 | -0.02463 | -0.05685 | -0.04243 |
| 2007-12-01 | -0.00479 | 0.027519 | 0.022478 | -0.01886 | 0.006115 | 0.017335 |
| 2008-01-01 | -0.032 | -0.02409 | -0.06945 | -0.07638 | -0.08446 | -0.06186 |
| 2008-02-01 | 0.007836 | -0.08631 | 0.040458 | 0.059858 | -0.04196 | -0.02334 |
| 2008-03-01 | -0.0093 | -0.11564 | 0.009261 | 0.030599 | -0.05291 | -0.04342 |
| 2008-04-01 | 0.049301 | 0.030319 | 0.067715 | 0.035111 | 0.033318 | 0.057435 |
| 2008-05-01 | 0.051801 | 0.042444 | -0.00904 | 0.037648 | 0.023163 | 0.03127 |
| 2008-06-01 | 0.006063 | -0.12437 | -0.02905 | -0.03935 | -0.0436 | -0.06785 |
| 2008-07-01 | -0.07467 | -0.08929 | -0.08371 | -0.10852 | -0.05832 | -0.07231 |
| 2008-08-01 | -0.0214 | 0.070782 | -0.04002 | -0.03029 | 0.041473 | 0.01704 |
| 2008-09-01 | -0.06648 | -0.05079 | -0.05346 | -0.0631 | -0.0278 | -0.0441 |
| 2008-10-01 | -0.24999 | -0.27517 | -0.21267 | -0.19871 | -0.15129 | -0.2003 |
| 2008-11-01 | -0.07451 | -0.11879 | -0.04239 | -0.04246 | -0.0547 | -0.01366 |
| 2008-12-01 | -0.06688 | 0.00676 | 0.091341 | 0.055651 | -0.03473 | 0.009911 |
| 2009-01-01 | 0.050098 | -0.01809 | -0.03614 | 0.005637 | -0.01213 | 0.005319 |
| 2009-02-01 | -0.05116 | -0.01726 | -0.08438 | -0.05016 | -0.08599 | -0.05133 |
| 2009-03-01 | -0.01617 | -0.02778 | -0.01202 | -0.02267 | -0.06529 | -0.08019 |
| 2009-04-01 | 0.103747 | 0.199468 | 0.125561 | 0.051131 | 0.085832 | 0.071923 |
| 2009-05-01 | 0.082741 | 0.174765 | 0.107903 | 0.058452 | 0.05966 | 0.081844 |
| 2009-06-01 | 0.034701 | 0.130964 | 0.030788 | 0.032081 | 0.005067 | -0.00825 |
| 2009-07-01 | -0.00735 | -0.01001 | 0.028711 | 0.020621 | 0.024009 | 0.005791 |
| 2009-08-01 | 0.049138 | 0.051891 | 0.101696 | 0.0717 | 0.084311 | 0.085071 |
| 2009-09-01 | 0.038927 | 0.060307 | 0.037989 | 0.013313 | 0.034573 | 0.055177 |
| 2009-10-01 | 0.004778 | 0.028647 | 0.031039 | 0.029302 | 0.013173 | 0.025125 |
| 2009-11-01 | 0.01003 | -0.01206 | 0.018082 | 0.03005 | 0.000424 | 0.015591 |
| 2009-12-01 | 0.015934 | 0.02767 | 0.049618 | 0.023148 | 0.022068 | 0.014266 |
| 2010-01-01 | 0.00545 | 0.007769 | -0.00322 | 0.01215 | 0.01417 | 0.017543 |

| 2010-02-01 | -0.01767 | -0.06291 | -0.0224 | -0.03621 | -0.00738 | -0.03379 |
| --- | --- | --- | --- | --- | --- | --- |
| 2010-03-01 | 0.04375 | 0.064298 | 0.046293 | 0.055614 | 0.051197 | 0.071735 |
| 2010-04-01 | 0.01576 | 0.023721 | 0.023149 | 0.029479 | -0.00031 | 0.017968 |
| 2010-05-01 | -0.02959 | -0.04874 | -0.05911 | -0.06224 | -0.07394 | -0.08874 |
| 2010-06-01 | -0.01041 | 0.026666 | 0.011479 | -0.0046 | -0.00664 | -0.0188 |
| 2010-07-01 | -0.0115 | 0.03119 | 0.004464 | 0.011714 | -0.02702 | 0.00368 |
| 2010-08-01 | 0.015579 | 0.018267 | 0.002351 | 0.00349 | 0.015839 | 0.022544 |
| 2010-09-01 | 0.036428 | 0.06139 | 0.022308 | 0.030332 | 0.017394 | 0.044231 |
| 2010-10-01 | 0.032748 | 0.046603 | 0.053938 | 0.051442 | 0.010772 | 0.030814 |
| 2010-11-01 | 0.021672 | -0.0067 | 0.044814 | 0.041987 | 0.016535 | 0.008262 |
| 2010-12-01 | 0.033805 | -0.00947 | 0.042129 | 0.016658 | 0.007333 | 0.025183 |
| 2011-01-01 | 0.008274 | -0.03325 | 0.000615 | 0.010936 | 0.003035 | 0.014783 |
| 2011-02-01 | 0.03836 | -0.06632 | -0.0206 | 0.01367 | 0.012389 | 0.008806 |
| 2011-03-01 | 0.000998 | 0.023007 | -0.01941 | -0.03425 | -0.04226 | -0.02762 |
| 2011-04-01 | 0.002147 | 0.05296 | 0.019326 | 0.032635 | 0.013297 | 0.026102 |
| 2011-05-01 | -0.0247 | -0.06008 | -0.04631 | -0.0159 | 0.008314 | -0.01134 |
| 2011-06-01 | -0.03709 | -0.00528 | -0.00294 | -0.02281 | -0.05097 | -0.02587 |
| 2011-07-01 | 0.012817 | 0.021034 | 0.019792 | 0.022721 | -0.02958 | 0.020105 |
| 2011-08-01 | -0.06911 | -0.09813 | -0.06122 | -0.07264 | -0.1383 | -0.1155 |
| 2011-09-01 | -0.02084 | -0.01086 | 0.007131 | 0.022981 | 0.024027 | -0.00699 |
| 2011-10-01 | -0.02036 | 0.006092 | 0.01105 | 0.019808 | 0.043939 | 0.03387 |
| 2011-11-01 | 0.010963 | -0.00352 | 0.04982 | 0.030091 | -0.01774 | -0.00113 |
| 2011-12-01 | -0.01434 | -0.04513 | 0.011241 | 0.00719 | 0.032666 | 0.014796 |
| 2012-01-01 | 0.037054 | 0.02561 | 0.011747 | 0.031836 | 0.042229 | 0.036854 |
| 2012-02-01 | 0.018792 | 0.084348 | 0.022218 | 0.025825 | 0.023339 | 0.035308 |
| 2012-03-01 | -0.00673 | -0.02635 | 0.007066 | -0.00731 | 0.008382 | -0.00305 |
| 2012-04-01 | -0.02684 | -0.005 | 0.026976 | 0.000409 | -0.01307 | -0.02586 |
| 2012-05-01 | -0.04256 | -0.05161 | -0.02525 | -0.00994 | -0.03749 | -0.04566 |
| 2012-06-01 | -0.01147 | 0.018135 | -0.00498 | 0.00845 | -0.00617 | -0.0019 |
| 2012-07-01 | 0.011233 | 0.027871 | 0.062095 | 0.00637 | 0.047311 | 0.031906 |
| 2012-08-01 | 0.024156 | 0.022103 | -0.0038 | 0.042399 | 0.034898 | 0.027922 |
| 2012-09-01 | 0.029698 | 0.031761 | -0.00291 | 0.008959 | 0.010491 | 0.001615 |
| 2012-10-01 | 0.005885 | 0.03049 | 0.037027 | 0.022489 | 0.017953 | 0.004532 |
| 2012-11-01 | -0.01453 | -0.00254 | -0.01051 | 0.022743 | 0.002548 | -0.00762 |
| 2012-12-01 | 0.011017 | 0.035891 | 0.043064 | 0.033188 | 0.030065 | 0.023597 |
| 2013-01-01 | 0.028906 | 0.026239 | 0.040649 | 0.035897 | 0.04888 | 0.037215 |
| 2013-02-01 | 0.005977 | -0.02089 | -0.01033 | 0.003853 | 0.031783 | 0.026626 |
| 2013-03-01 | 0.003254 | -0.01827 | -0.02464 | 0.000993 | 0.035049 | 0.018525 |
| 2013-04-01 | -0.03804 | -0.01422 | -0.0067 | -0.04098 | -0.00224 | -0.01112 |
| 2013-05-01 | 0.02308 | 0.056718 | -0.04094 | 0.050805 | 0.045366 | 0.042892 |
| 2013-06-01 | -0.02942 | -0.04155 | -0.04819 | -0.02077 | -0.05801 | -0.05298 |

| 2013-07-01 | 0.019687 | 0.029891 | 0.024785 | 0.011807 | 0.030139 | 0.034085 |
| --- | --- | --- | --- | --- | --- | --- |
| 2013-08-01 | 0.012549 | -0.0536 | 0.022795 | 0.048493 | 0.010898 | 0.000351 |
| 2013-09-01 | 0.014883 | 0.048536 | -0.01232 | 0.026602 | 0.010213 | 0.004929 |
| 2013-10-01 | 0.018518 | 0.042073 | -0.00599 | 0.019058 | 0.005858 | 0.002984 |
| 2013-11-01 | 0.026134 | 0.008365 | 0.002503 | 0.016603 | 0.026355 | 0.01845 |
| 2013-12-01 | -0.00304 | 0.016903 | 0.036351 | -0.01456 | -0.02396 | -0.01662 |
| 2014-01-01 | 0.027182 | -0.00157 | -0.01326 | 0.035777 | 0.034312 | 0.019904 |
| 2014-02-01 | 0.017733 | -0.01923 | -0.04219 | 0.004951 | 0.005762 | -0.00348 |
| 2014-03-01 | 0.022116 | 0.06015 | -0.02188 | 0.01851 | -0.00195 | -0.00921 |
| 2014-04-01 | 0.011272 | 0.034252 | 0.036729 | 0.024664 | 0.011338 | 0.002687 |
| 2014-05-01 | 0.012863 | 0.047863 | 0.027393 | 0.02031 | 0.020585 | 0.027272 |
| 2014-06-01 | 0.022324 | 0.063043 | 0.021749 | 0.023552 | 0.008147 | -0.00426 |
| 2014-07-01 | 0.020019 | 0.019949 | 0.028972 | 0.021863 | -0.00892 | -0.00476 |
| 2014-08-01 | 0.007705 | 0.01361 | 0.022627 | -0.00852 | -0.01175 | -0.00842 |
| 2014-09-01 | -0.00099 | 0.031052 | 0.016528 | -0.00636 | 0.036171 | 0.00927 |
| 2014-10-01 | -0.06141 | -0.0107 | -0.0392 | -0.05604 | -0.0371 | -0.056 |
| 2014-11-01 | 0.025558 | 0.054548 | 0.010127 | 0.04238 | 0.050074 | 0.036088 |
| 2014-12-01 | -0.03222 | -0.01722 | -0.04326 | -0.024 | 0.00843 | -0.0145 |
| 2015-01-01 | 0.007909 | 0.022621 | -0.01243 | 0.008257 | -0.04637 | 0.009783 |
| 2015-02-01 | 0.046707 | 0.023516 | 0.023864 | 0.060935 | 0.017973 | 0.03939 |
| 2015-03-01 | -0.01588 | -0.01247 | 0.017415 | -0.00217 | 0.048566 | 0.000869 |
| 2015-04-01 | 0.024186 | -0.0146 | 0.029418 | 0.023009 | 0.0133 | 0.016082 |
| 2015-05-01 | -0.01056 | -0.02741 | -0.00031 | 0.003176 | -0.01214 | -0.0017 |
| 2015-06-01 | -0.01939 | -0.00986 | -0.00256 | -0.03628 | -0.01605 | -0.02922 |
| 2015-07-01 | -0.02694 | 0.031831 | -0.00047 | -0.00138 | 0.016286 | -0.02034 |
| 2015-08-01 | -0.02875 | -0.0227 | -0.0248 | -0.02403 | -0.00313 | -0.03064 |
| 2015-09-01 | -0.04033 | -0.06263 | -0.0191 | -0.01504 | -0.05375 | -0.05726 |
| 2015-10-01 | 0.02085 | 0.04797 | 0.029647 | 0.059721 | 0.011245 | 0.040795 |
| 2015-11-01 | -0.02482 | -0.03749 | 0.005723 | -0.00838 | 0.024476 | -0.00536 |
| 2015-12-01 | -0.022 | -0.01275 | -0.033 | -0.05089 | -0.01926 | -0.02189 |
| 2016-01-01 | -0.05801 | -0.03571 | -0.03654 | -0.03664 | -0.04369 | -0.0384 |
| 2016-02-01 | 0.018276 | -0.04448 | 0.039981 | 0.017614 | -0.05016 | -0.0095 |
| 2016-03-01 | 0.05852 | 0.047895 | 0.043859 | 0.066076 | 0.012403 | 0.045102 |
| 2016-04-01 | 0.019926 | 0.024898 | 0.007102 | 0.00415 | 0.007433 | 0.019123 |
| 2016-05-01 | 0.014877 | 0.008471 | 0.002501 | 0.001646 | 0.004149 | -0.01586 |
| 2016-06-01 | 0.013442 | 0.039082 | -0.00226 | 0.002988 | -0.00792 | 0.000342 |
| 2016-07-01 | 0.027079 | 0.035649 | 0.023953 | -0.00282 | 0.022134 | 0.074942 |
| 2016-08-01 | 0.017087 | 0.0117 | 0.024778 | 0.003707 | 0.01163 | 0.024712 |
| 2016-09-01 | -0.0024 | 0.017126 | -0.01379 | -0.00794 | 0.005379 | -0.00127 |
| 2016-10-01 | 0.004744 | -0.01724 | 0.019915 | -0.01874 | -0.01792 | 0.028566 |
| 2016-11-01 | 0.007516 | -0.04705 | -0.04695 | -0.01904 | -0.02753 | -0.0301 |

| 2016-12-01 | 0.029205 | -0.01317 | -0.00603 | -0.00845 | 0.03317 | 0.024313 |
| --- | --- | --- | --- | --- | --- | --- |
| 2017-01-01 | 0.014076 | 0.030516 | 0.022139 | 0.044524 | 0.028885 | 0.033499 |
| 2017-02-01 | 0.01106 | 0.04632 | 0.014068 | -0.00058 | 0.016017 | 0.004454 |
| 2017-03-01 | -0.00862 | 0.026892 | 0.018516 | -0.0063 | 0.024299 | 0.016317 |
| 2017-04-01 | 0.007809 | 0.014908 | 0.022724 | 0.022147 | 0.005848 | -0.01224 |
| 2017-05-01 | -0.00972 | 0.023412 | 0.00222 | 0.017196 | 0.043218 | 0.020231 |
| 2017-06-01 | -0.01148 | 0.024249 | -0.00232 | -0.04371 | -0.00564 | 0.0061 |
| 2017-07-01 | -0.01011 | 0.023333 | 0.034407 | 0.034169 | 0.001185 | -0.00917 |
| 2017-08-01 | -0.00261 | -0.00406 | 0.005888 | 0.042852 | 0.002203 | 0.001755 |
| 2017-09-01 | 0.010832 | 0.004293 | -0.01724 | -0.0003 | 0.0065 | -0.01007 |
| 2017-10-01 | 0.034824 | 0.014309 | -0.0099 | 0.034138 | 0.024582 | 0.023385 |
| 2017-11-01 | 0.013234 | 0.0319 | -0.03639 | 0.03797 | 0.003244 | -0.00896 |
| 2017-12-01 | 0.004196 | 0.00161 | 3.27E-05 | -0.02694 | 0.011232 | 0.00684 |
| 2018-01-01 | 0.010503 | 0.046342 | 0.03742 | 0.033262 | 0.015133 | 0.026735 |
| 2018-02-01 | -0.05288 | -0.02158 | -0.02353 | -0.04146 | -0.056 | -0.0588 |
| 2018-03-01 | 0.003434 | -0.02851 | -0.02686 | -0.00422 | -0.01787 | -0.02333 |
| 2018-04-01 | -0.00676 | 0.024359 | 0.014962 | -0.01743 | -0.00084 | 0.026261 |
| 2018-05-01 | 0.037805 | 0.027083 | -0.04431 | 0.015138 | 0.015575 | 0.054735 |
| 2018-06-01 | 0.017393 | 0.009138 | 0.006763 | -0.00575 | -0.02887 | -0.00387 |
| 2018-07-01 | 0.010544 | 0.027887 | 0.050239 | -0.00444 | 0.031463 | -0.00077 |
| 2018-08-01 | -0.00545 | 0.044477 | 0.011217 | 0.014865 | 0.019769 | -0.00612 |
| 2018-09-01 | -0.01255 | -0.01756 | -0.00032 | -0.01908 | -0.01258 | -0.02915 |
| 2018-10-01 | -0.04238 | -0.0773 | -0.04364 | -0.07027 | -0.02022 | -0.03428 |
| 2018-11-01 | -0.02085 | 0.019007 | -0.09637 | -0.00819 | 0.002798 | -0.01357 |
| 2018-12-01 | -0.04527 | 0.015971 | -0.03384 | -0.01552 | -0.04179 | -0.03761 |
| 2019-01-01 | 0.035781 | 0.005654 | 0.046188 | 0.031967 | 0.021128 | 0.010982 |
| 2019-02-01 | 0.052684 | 0.002364 | -0.00155 | 0.027679 | 0.048151 | 0.041644 |
| 2019-03-01 | 0.019228 | 0.039542 | -0.02247 | 0.021588 | 0.023922 | 0.007977 |
| 2019-04-01 | 0.021924 | 0.034158 | 0.055465 | 0.042476 | 0.022703 | 0.03169 |
| 2019-05-01 | -0.00954 | -0.00795 | -0.03331 | -0.03623 | 0.000728 | -0.02128 |
| 2019-06-01 | 0.000134 | 0.024852 | 0.00229 | 0.031176 | 0.022544 | 0.010844 |
| 2019-07-01 | 0.011369 | -0.02341 | -0.02707 | -0.00744 | 0.014101 | 0.025479 |
| 2019-08-01 | -0.01618 | -0.03887 | -0.05244 | -0.05217 | -0.01467 | -0.04757 |
| 2019-09-01 | 0.02597 | 0.009092 | 0.066013 | 0.018055 | 0.024408 | 0.016724 |
| 2019-10-01 | -0.0162 | 0.030716 | 0.008863 | -0.00902 | -0.00295 | -0.01357 |
| 2019-11-01 | 0.031338 | 0.045947 | 0.00478 | 0.023279 | 0.031284 | 0.017444 |
| 2019-12-01 | 0.006392 | 0.013922 | 0.002495 | -0.00286 | 0.016879 | 0.010303 |
| 2020-01-01 | 0.019395 | 0.006988 | 0.029077 | 0.016679 | 0.019905 | 0.017741 |
| 2020-02-01 | 0.010865 | -0.01498 | -0.01338 | -0.015 | 0.011196 | -0.0328 |
| 2020-03-01 | -0.24394 | -0.22895 | -0.16531 | -0.22176 | -0.18071 | -0.24193 |
| 2020-04-01 | 0.0229 | -0.0546 | -0.08137 | 0.060192 | 0.048665 | -0.00039 |
| 2020-05-01 | 0.056315 | 0.022363 | 0.054112 | 0.04727 | 0.018563 | 0.037186 |
| 2020-06-01 | 0.038834 | 0.087891 | 0.04041 | 0.063444 | 0.031638 | 0.047138 |
| 2020-07-01 | 0.028215 | 0.077683 | -0.02183 | 0.036009 | 0.019768 | -0.01245 |
| 2020-08-01 | 0.039443 | 0.03492 | 0.028088 | 0.017614 | -0.00351 | -0.01615 |
| 2020-09-01 | -0.02016 | 0.000844 | -0.04594 | -0.03282 | 0.013343 | -0.02258 |
| 2020-10-01 | 0.000496 | 0.042642 | 0.034404 | -0.00667 | -0.01994 | -0.01384 |
| 2020-11-01 | 0.030416 | 0.072357 | 0.069746 | 0.037997 | 0.024673 | 0.06148 |
| 2020-12-01 | 0.045892 | 0.071443 | 0.072966 | 0.0451 | 0.005589 | 0.0463 |
